# Supplementary material for: Growing up in a rough world: scaling of frictional adhesion and morphology of the Tokay gecko (Gekko gecko)
Source: Beilstein J Nanotechnol. 2022 Nov 9;13:1292–302. doi: 10.3762/bjnano.13.107 (PMC9663969; doi:10.3762/bjnano.13.107)
Supplement: File 1 — Adhesion data. [file Beilstein_J_Nanotechnol-13-1292-s001.xlsx]

## Sheet: geckoadhesion
		Adhesive force	Adhesive force	Adhesive force	Adhesive force	Adhesive force	Adhesive force	Adhesive force	Adhesive force
ID number	Mass	100 grit	150 grit	320 grit	400 grit	1000 grit	2000 grit	3000 grit	Acrylic sheet
	g	N	N	N	N	N	N	N	N
UCR09	4.6	0.214	0.424	0.657	0.826	1.538	1.672	1.528	2.31
UCR07	5.4	0.36	0.492	0.255	0.635	1.394	1.468	1.511	1.92
UCR08	5.7	0.248	0.248	0.308	0.553	1.61	1.594	1.778	2.142
UCR02	29.72	0.421	0.5281	0.469	1.817	3.552	4.529	2.908	5.942
UCR01	30.64	0.564	0.591	0.522	1.904	2.947	3.656	3.215	5.916
UCR03	32.01	0.873	1.453	1.291	3.316	4.83	5.86	4.141	6.325
UCR13	35	0.812	0.746	0.712	4.486	6.349	4.57	6.246	5.686
UCR06	37.6	1.191	2.595	2.346	3.799	5.022	6.084	6.79	8.504
UCR10	42.7	0.704	1.754	1.01	2.693	4.889	5.732	4.432	6.654
UCR11	43.8	0.91	3.194	4.393	4.128	7.47	6.428	4.915	6.566
UCR12	44.6	1.516	2.101	1.344	4.779	3.387	7.264	2.758	6.478
UCR14	57.3	0.556	0.548	0.622	2.41	3.946	7.864	7.998	8.898
UCR04	116.2	1.174	2.747	4.404	7.162	9.668	9.978	9.714	10.362
UCR05	124.9	1.988	3.282	4.944	7.624	8.884	8.756	9.308	12.102
