# Supplementary material for: Growing up in a rough world: scaling of frictional adhesion and morphology of the Tokay gecko (Gekko gecko)
Source: Beilstein J Nanotechnol. 2022 Nov 9;13:1292–302. doi: 10.3762/bjnano.13.107 (PMC9663969; doi:10.3762/bjnano.13.107)
Supplement: File 2 — Morphology data. [file Beilstein_J_Nanotechnol-13-1292-s002.csv]

LSUHC ID	SVL	Toepad area	Setal width	Aspect Ratio	Setal length
	mm	mm^2	�m		�m
11442	52.6	5.061	4.835	18.884	91.3
10551	59.5	7.089	4.61	20.297	93.57
11422	68	8.49	4.151	26.406	109.6
13912	69.9	9.258	4.976	21.723	108.1
13842	79.9	12.678	4.342	23.422	101.7
13629	86.8	13.659	5.29	18.543	98.09
13849	101.4	18.909	4.724	22.822	107.8
13850	104.7	18.006	4.129	25.941	107.1
13848	106.5	12.564	4.56	23.645	107.83
7754	120	22.877	4.252	28.04	119.217
13954	133.8	30.531	5.281	23.993	126.714
13520	142.9	38.334	4.096	30.792	126.125
14198	146.27	44.672	3.881	30.247	117.375
6815	155.3	46.218	4.577	25.105	114.904
14157	170.5	69.335	6.086	20.642	125.625
